# Supplementary material for: Digital literacy and ICT use: key predictors of mathematics achievement in schoolchildren
Source: Springer Nature journal article supplement (doi:10.1007/s10212-025-01055-0), 2026-01-16
Supplement: MOESM1 [file 10212_2025_1055_MOESM1_ESM.docx]

Appendix

ICT use for social communication and ICT use for study purposes: ESEM results

|  | Factor 1 | | |  | Factor 2 | | |
| --- | --- | --- | --- | --- | --- | --- | --- |
|  |  |
|  | Factor loading | (S.E.) | P-Value | | Factor loading | (S.E.) | P-Value |
| ICT use for social communication/Share news from current events on social media | 0.64 | (0.02) | 0.00 |  | 0.03 | (0.02) | 0.19 |
| ICT use for social communication/Write posts and updates about what happens in your life on social media | 0.75 | (0.02) | 0.00 |  | -0.01 | (0.02) | 0.72 |
| ICT use for social communication/Post images or video in social networks or online communities | 0.79 | (0.02) | 0.00 |  | 0.00 | (0.01) | 0.88 |
| ICT use for social communication/Watch videos or images other people posted online | 0.49 | (0.02) | 0.00 |  | -0.06 | (0.03) | 0.03 |
| ICT use for social communication/Send or forward information about events or activities to other people | 0.45 | (0.03) | 0.00 |  | 0.13 | (0.03) | 0.00 |
| ICT use for study purposes/Prepare presentations | -0.08 | (0.03) | 0.02 |  | 0.49 | (0.04) | 0.00 |
| ICT use for study purposes/Work online with other students | 0.02 | (0.03) | 0.49 |  | 0.46 | (0.04) | 0.00 |
| ICT use for study purposes/Complete [worksheets] or exercises | -0.10 | (0.03) | 0.01 |  | 0.55 | (0.05) | 0.00 |
| ICT use for study purposes/Use the Internet to do research | 0.08 | (0.03) | 0.01 |  | 0.38 | (0.04) | 0.00 |
| ICT use for study purposes/Use software or applications to learn skills or a subject | 0.00 | (0.00) | 0.53 |  | 0.50 | (0.04) | 0.00 |
| ICT use for study purposes/Use coding software to complete assignments | 0.05 | (0.03) | 0.16 |  | 0.48 | (0.04) | 0.00 |
| F1 with F2 | 0.10 | 0.16 | 0.49 |  |  |  |  |
